# Supplementary material for: Single-Cell Atlas of the Drosophila Leg Disc Identifies a Long Non-Coding RNA in Late Development
Source: Int J Mol Sci. 2022 Jun 18;23(12):6796. doi: 10.3390/ijms23126796 (PMC9224501; doi:10.3390/ijms23126796)
Supplement: Supplementary file 1 [file ijms-23-06796-s001.zip]

Archive with 7 entries (7 files):
- Figure S1.pdf
- Figure S2.pdf
- Figure S3.pdf
- Figure S4.pdf
- Supplementary_legends_Drosophila_singlecell_w1118.pdf
- Table S1.pdf
- Table S2.pdf
